# Supplementary material for: PubMLST for Antigen Allele Mining to Inform Development of Gonorrhea Protein-Based Vaccines
Source: Front Microbiol. 2018 Dec 7;9:2971. doi: 10.3389/fmicb.2018.02971 (PMC6292995; doi:10.3389/fmicb.2018.02971)
Supplement: Supplementary file 1 [file Table_1.XLSX]

## Sheet: Breakdown
Breakdown of NEISp1632 by species:
Selected options: Display values only.
NEISp1632	species
	Neisseria animalis	Neisseria animaloris	Neisseria bacilliformis	Neisseria bergeri	Neisseria canis	Neisseria cinerea	Neisseria dentiae	Neisseria elongata	Neisseria elongata subsp. elongata	Neisseria elongata subsp. glycolytica	Neisseria elongata subsp. nitroreducens	Neisseria flavescens	Neisseria gonorrhoeae	Neisseria lactamica	Neisseria meningitidis	Neisseria mucosa	Neisseria musculi	Neisseria oralis	Neisseria perflava	Neisseria polysaccharea	Neisseria shayeganii	Neisseria sicca	Neisseria sp.	Neisseria subflava	Neisseria wadsworthii	Neisseria weaveri	Neisseria zoodegmatis	Non-Neisseria sp.	Total
Total	1	1	4	2	2	27	2	1	1	1	1	2	5073	818	40843	28	8	10	3	31	1	2	54	55	1	2	1	11	46986
No value		1	4	2	2	23	2	1	1	1	1	2	1142	672	28581	27	8	10	3	17	1	2	54	52	1	2	1	10	30623
2															2467														2467
1															1579														1579
238													1180		1														1181
63															1107														1107
6															994														994
12															964														964
233													834																834
235													827																827
4															691														691
3															628														628
236													504																504
234													496																496
7															486														486
62															415														415
16															255														255
35															237														237
11															229														229
23															217														217
26															211														211
8															170														170
54															143														143
47															131														131
115															116														116
21															110														110
49														91															91
48															86														86
44															81														81
19															74														74
27															61														61
0						4							23	12	5	1				3								1	49
45															45														45
53															45														45
58															44														44
177															41														41
112															36														36
125															33														33
66															25														25
251														24															24
192															23														23
111															20														20
64															19														19
113															17														17
31															16														16
247													14																14
221															14														14
38															13														13
13															12														12
124															12														12
108															10														10
228															10														10
415															10														10
103															9														9
231															9														9
102															8														8
237													7																7
22															7														7
52															7														7
116															7														7
361															7														7
303													6																6
32															6														6
59															6														6
88															6														6
143															6														6
149															6														6
179															6														6
297													5																5
51															5														5
122															5														5
178															5														5
186															5														5
307															5														5
421															5														5
280													4																4
10															4														4
15															4														4
29															4														4
33															4														4
133															4														4
150															4														4
152															4														4
159															4														4
345															4														4
243													3																3
611													3																3
101															3														3
109															3														3
145															3														3
148															3														3
153															3														3
165															3														3
171															3														3
174																				3									3
182															3														3
420															3														3
433															3														3
452															3														3
551															3														3
96														2															2
97														2															2
151														2															2
196														2															2
240														2															2
359														2															2
275													2																2
283													2																2
291													2																2
305													2																2
612													2																2
9															2														2
14															2														2
17															2														2
18															2														2
24															2														2
34															2														2
39															2														2
70															2														2
77																				2									2
81																				2									2
89																								2					2
107															2														2
120															2														2
140															2														2
170															2														2
180															2														2
184															2														2
185															2														2
189															2														2
195															2														2
263															2														2
312															2														2
343															2														2
355															2														2
358															2														2
387															2														2
398															2														2
434															2														2
447															2														2
466															2														2
468															2														2
547															2														2
605															2														2
5														1															1
42														1															1
68														1															1
69														1															1
76														1															1
91														1															1
190														1															1
246													1																1
270													1																1
292													1																1
295													1																1
300													1																1
302													1																1
304													1																1
330													1																1
331													1																1
368													1																1
429													1																1
606													1																1
608													1																1
609													1																1
610													1																1
20															1														1
25															1														1
28															1														1
30															1														1
36															1														1
41															1														1
50															1														1
60															1														1
75	1																												1
78																				1									1
79															1														1
80															1														1
82															1														1
87															1														1
94															1														1
99															1														1
117															1														1
121															1														1
123															1														1
127															1														1
129															1														1
130															1														1
131															1														1
132															1														1
134															1														1
137															1														1
138															1														1
139															1														1
142															1														1
144															1														1
147															1														1
154															1														1
166															1														1
167															1														1
168															1														1
169															1														1
172															1														1
173															1														1
176															1														1
181															1														1
191															1														1
193															1														1
197															1														1
209															1														1
220															1														1
229															1														1
230															1														1
232																								1					1
254															1														1
259															1														1
278															1														1
279															1														1
306															1														1
308															1														1
310															1														1
311															1														1
315															1														1
316															1														1
317															1														1
323															1														1
325															1														1
328															1														1
342															1														1
344															1														1
349															1														1
350															1														1
352															1														1
353															1														1
354															1														1
356															1														1
363															1														1
370															1														1
374															1														1
377															1														1
378															1														1
379															1														1
380															1														1
382															1														1
395															1														1
402															1														1
412															1														1
418															1														1
419															1														1
424															1														1
425															1														1
430															1														1
431															1														1
436															1														1
437															1														1
438															1														1
443																				1									1
446															1														1
449															1														1
456															1														1
458															1														1
461															1														1
463															1														1
464															1														1
467															1														1
469															1														1
472															1														1
486															1														1
545															1														1
546															1														1
550															1														1
557															1														1
558															1														1
559															1														1
574																				1									1
575																				1									1
598															1														1
599															1														1
603															1														1
